# Supplementary material
Source: PubMed Central journal article supplement (PMC3813871)
Supplement: 6954aa15413149576e1da9062bfdec31_genetics.113.156984-2.pdf [file 6954aa15413149576e1da9062bfdec31_genetics.113.156984-2.pdf]

**Table S2 Clusters Of Genes Showing Temporal Expression During 3-8 Hr Time Germination Time Course and Genes Found Uniquely Higher Or Lower Expressed In The 4-6 Hr Loop.** Genes ID Numbers In Bold Are Genes Up Regulated In The  $\Delta Pp-1$  Mutant Compared To Wild Type.

| Gene ID         | Annotation                                      | Cluster | Gene ID         | Annotation                             | Cluster |
|-----------------|-------------------------------------------------|---------|-----------------|----------------------------------------|---------|
| <b>NCU00566</b> | Synaptobrevin                                   | 1       | NCU00601        | Nf                                     | 2       |
| NCU00881        | <i>Ham-7</i>                                    | 1       | NCU00746        | <i>Crp-68</i>                          | 2       |
| <b>NCU00906</b> | Hypothetical                                    | 1       | NCU01380        | Hypothetical                           | 2       |
| <b>NCU01183</b> | <i>Gtp-1</i>                                    | 1       | NCU01697        | Hypothetical                           | 2       |
| <b>NCU01772</b> | DNA-Directed RNA Polymerase III                 | 1       | NCU02176        | Hypothetical                           | 2       |
| <b>NCU02500</b> | <i>Ccg-4</i>                                    | 1       | NCU02458        | Hypothetical                           | 2       |
| <b>NCU02635</b> | Mannan Polymerase Complexes MNN9 Subunit        | 1       | NCU03196        | Cyclin Pch1                            | 2       |
| <b>NCU02644</b> | Hypothetical                                    | 1       | NCU03868        | Hypothetical                           | 2       |
| NCU03276        | <i>Bem46</i>                                    | 1       | NCU04429        | Mitochondrial Import Protein Mmp37     | 2       |
| <b>NCU03669</b> | Adomet-Dependent Rrna Methyltransferase Spb1    | 1       | NCU04729        | Hypothetical                           | 2       |
| NCU03708        | Hypothetical                                    | 1       | NCU05178        | Hypothetical                           | 2       |
| <b>NCU03794</b> | Periodic Tryptophan Protein 2                   | 1       | NCU05357        | Predicted                              | 2       |
| <b>NCU03830</b> | Hypothetical                                    | 1       | NCU06373        | Hypothetical                           | 2       |
| <b>NCU03837</b> | Snf1 Kinase Complex Beta-Subunit Gal83          | 1       | <b>NCU08457</b> | Eas                                    | 2       |
| NCU03960        | Hypothetical                                    | 1       | NCU08833        | Hypothetical                           | 2       |
| NCU04122        | Malate Dehydrogenase                            | 1       | NCU10052        | Hypothetical                           | 2       |
| <b>NCU04344</b> | Eif2b-Alpha                                     | 1       | <b>NCU00209</b> | Hypothetical                           | 3       |
| <b>NCU04611</b> | Transcription Elongation Factor Spt-6           | 1       | NCU00265        | Hypothetical                           | 3       |
| NCU04732        | <i>Ham-11</i>                                   | 1       | <b>NCU00309</b> | WSC Domain-Containing Protein          | 3       |
| NCU04834        | <i>Phy-1</i>                                    | 1       | <b>NCU01121</b> | Hypothetical                           | 3       |
| <b>NCU05194</b> | DNA Replication Licensing Factor Mcm6           | 1       | NCU01618        | Predicted                              | 3       |
| NCU05337        | Predicted                                       | 1       | <b>NCU04047</b> | Hypothetical                           | 3       |
| NCU05400        | Hypothetical                                    | 1       | NCU04349        | <i>Stk-58 (CHECK)</i>                  | 3       |
| NCU05814        | Hypothetical                                    | 1       | <b>NCU04452</b> | <i>Mig-3</i>                           | 3       |
| NCU06115        | Hypothetical                                    | 1       | NCU05127        | D-Alanyl-Alanine Synthetase A          | 3       |
| NCU06919        | Hypothetical                                    | 1       | NCU05495        | <i>Ccg-16</i>                          | 3       |
| NCU07029        | Hypothetical                                    | 1       | NCU05502        | Hypothetical                           | 3       |
| <b>NCU07313</b> | Chromosome Transmission Fidelity Protein 18     | 1       | NCU05831        | Hypothetical                           | 3       |
| <b>NCU07503</b> | Hypothetical                                    | 1       | NCU06514        | Hypothetical                           | 3       |
| <b>NCU07528</b> | Trna Pseudouridine Synthase                     | 1       | NCU07439        | Hypothetical                           | 3       |
| NCU07609        | MFS Transporter                                 | 1       | NCU07802        | Hypothetical                           | 3       |
| NCU07610        | Taurine Dioxygenase                             | 1       | NCU09562        | Hypothetical                           | 3       |
| <b>NCU07719</b> | Isopentenyl-Diphosphate Delta-Isomerase         | 1       | NCU09693        | Hypothetical                           | 3       |
| NCU08332        | <i>Hex-1</i>                                    | 1       | NCU09802        | Hypothetical                           | 3       |
| NCU08656        | Hypothetical                                    | 1       | <b>NCU09894</b> | CCAAT-Box-Binding Transcription Factor | 3       |
| <b>NCU08824</b> | Molybdopterin Binding Domain-Containing Protein | 1       | NCU00811        | Hypothetical                           | 4       |

|                 |                           |   |                 |                                       |   |
|-----------------|---------------------------|---|-----------------|---------------------------------------|---|
| NCU09427        | <i>Gpr-3</i>              | 1 | NCU00995        | Hypothetical                          | 4 |
| <b>NCU09498</b> | Hypothetical              | 1 | <b>NCU02361</b> | Formamidase                           | 4 |
| <b>NCU09560</b> | Superoxide Dismutase      | 1 | <b>NCU02727</b> | Glycine Cleavage System T Protein     | 4 |
| <b>NCU10292</b> | Porphobilinogen Deaminase | 1 | <b>NCU06360</b> | Histidinol-Phosphate Aminotransferase | 4 |

Genes Uniquely Down Regulated In The 4-6 Hour Loop

Genes Uniquely Up Regulated In The 4-6 Hour Loop

| Gene ID    | Annotation                                                                         | Gene ID         | Annotation                             |
|------------|------------------------------------------------------------------------------------|-----------------|----------------------------------------|
| 1nc380_040 | Hypothetical                                                                       | <b>NCU00973</b> | Hypothetical                           |
| NCU00354   | Hypothetical                                                                       | <b>NCU01124</b> | Hypothetical                           |
| NCU00556   | RNA Binding Protein                                                                | <b>NCU02729</b> | Transducin Family Protein              |
| NCU01189   | Hypothetical                                                                       | <b>NCU03153</b> | Hypothetical                           |
| NCU01191   | Hypothetical                                                                       | <b>NCU03192</b> | Hypothetical                           |
| NCU01459   | Tan Spore <i>Asl-2</i>                                                             | <b>NCU04966</b> | Predicted Protein                      |
| NCU01545   | <i>Atg-8</i>                                                                       | <b>NCU09300</b> | RNA Polymerase II CTD Phosphatase Fcp1 |
| NCU02298   | Hypothetical                                                                       | <b>NCU09992</b> | Serine Peptidase                       |
| NCU02465   | Hypothetical                                                                       |                 |                                        |
| NCU02488   | Hypothetical                                                                       |                 |                                        |
| NCU03013   | Anchored Cell Wall Protein-10, <i>Acw-10</i>                                       |                 |                                        |
| NCU03344   | Hypothetical                                                                       |                 |                                        |
| NCU04192   | Vacuolar Aspartyl Aminopeptidase <i>Lap4</i>                                       |                 |                                        |
| NCU04278   | Hypothetical                                                                       |                 |                                        |
| NCU04542   | Hypothetical                                                                       |                 |                                        |
| NCU05233   | P60 Domain-Containing Protein                                                      |                 |                                        |
| NCU05395   | Hypothetical                                                                       |                 |                                        |
| NCU05408   | Predicted Protein                                                                  |                 |                                        |
| NCU05593   | Topogenesis Of Mitochondrial Outer Membrane Beta Barrel Proteins 55, <i>Tob-55</i> |                 |                                        |
| NCU05856   | Hypothetical                                                                       |                 |                                        |
| NCU05959   | Vesicle Transport V-SNARE Protein VTI1                                             |                 |                                        |
| NCU06698   | Glycogenin <i>Gnn</i>                                                              |                 |                                        |
| NCU07091   | Hypothetical                                                                       |                 |                                        |
| NCU07817   | Non-Anchored Cell Wall Protein-3, <i>Ncw-3</i>                                     |                 |                                        |
| NCU08037   | Hypothetical                                                                       |                 |                                        |
| NCU08257   | Hypothetical                                                                       |                 |                                        |
