# Supplementary material
Source: PubMed Central journal article supplement (PMC3813871)
Supplement: 12581188360e69c1934ebfd4d33906c6_genetics.113.156984-3.pdf [file 12581188360e69c1934ebfd4d33906c6_genetics.113.156984-3.pdf]

**Table S1 Primers Used In This Study**

| Primer Name    | Sequence                                               | Primer Name | Sequence                                                   |
|----------------|--------------------------------------------------------|-------------|------------------------------------------------------------|
| Pp-1-Paci-R06  | CTTTAATTAATACTAGCTCGTTTCGC<br>A                        | NCU00995R2  | GCGGATAACAATTTACACAGGAAACAG<br>CACGACCATCGAATTCCTACC       |
| Pp-1-Spei-F06  | CGACTAAGTATGTATTCTTCGCAGCATGC                          | NCU01121F1  | GTAACGCCAGGGTTTTCCAGTCACGAC<br>GGAAAGACTCTCCAGATCAGC       |
| Pp-1p-Noti-F06 | GCGGCCGCGACCATAGTGGTGTAGACTA<br>CT                     | NCU01121R1  | ATCCACTTAACGTTACTGAAATCTCCAAC<br>GGTATTGTTGGGAGTACTGG      |
| Pp-1p-Spei-R06 | CGACTAGTTCCAAGCTTAAAAACCTCCTT<br>GATA                  | NCU01121F2  | CTCCTTCAATATCATCTTCTGTCTCCGACC<br>TAGGAAATACGAAGGACGG      |
| Pp-1 Sgra1-F06 | TCTACCCACCGCGAGTATG                                    | NCU01121R2  | GCGGATAACAATTTACACAGGAAACAG<br>CAGTTACGACGAAACACCCAC       |
| Pp-1-Sfii-R06  | AAAGAGGACGAGTTGGCCTGCTGGTGG<br>GCCTTG                  | NCU01380F1  | GTAACGCCAGGGTTTTCCAGTCACGAC<br>GATATGCGGAGGCACTTCAAG       |
| Pp1-Smtrpr06   | CGCTGTAACAGAAGAACACCTT                                 | NCU01380R1  | ATCCACTTAACGTTACTGAAATCTCCAAC<br>TTGTGCTGAGGCTATCCGTT      |
| Pp1-Smtrp-F06  | AAGGTGTTCTTCTGTTACAGCG                                 | NCU01380F2  | CTCCTTCAATATCATCTTCTGTCTCCGACA<br>CCCTGAGCTTTATGTGACC      |
| Pp-1-Smc-F06   | TACGTCACTCATAAGCCAGAAG                                 | NCU01380R2  | GCGGATAACAATTTACACAGGAAACAG<br>CAAGCTCTATTGGCATGGAGG       |
| Pp-1-Smc-R06   | CTTCTGGCTGTATGAGCTGACGTA                               | F00811      | GCGCGCTTACTATTGAAG                                         |
| Pp-1-Afiii-F06 | CGTTTGGAGCACCTTAAGAG                                   | R00811      | GATAGATGGCGCAAAGGATG                                       |
| Pp-1-Nsii-R06  | GTAGATTGGAAGGGTGAATG                                   | F00995      | GAGGCAAGACGGTAAGTTGG                                       |
| Fqpcr00881     | TGCTCACATCAACTCC                                       | R00995      | TCCGGTTGGTATGTTGGTTT                                       |
| Rqpcr00881     | CCGAGGTTGACGTAGATA                                     | F01121      | CAGGGGAAAGCAATCAAGAG                                       |
| Fqpcr04732     | CAAGTATAACTCGGCTG                                      | R01121      | TCGTCAATCTCCTCCTCGTT                                       |
| Rqpcr04732     | TAGCACCTCGTGACAATG                                     | F01380      | CCATCGTCCAACCTTCCCTC                                       |
| Fqpcr02613     | GCTGGTTTGATTGGGGTAGA                                   | R01380      | TTCATGAGCATGTGTGCTTG                                       |
| Rqpcr02613     | AAGTAGGGGCGGAGTTTGAT                                   | F09693      | GCAGTCCAGTGGTGAAGGAT                                       |
| Fqpcr02246     | GCTTGCTCTCACGACTACC                                    | R09693      | CCGTTGACCCAGTAGGTTTG                                       |
| Rqpcr02246     | CGGAGCTAAAGCTCAAGGTG                                   | Hygrupflk   | GAATAGAGTAGATGCCGACC                                       |
| Fqpcrprm1      | TCTGCTCCAACAACCTCTTC                                   | Ccg-4_F     | CTTCTCCGTGACACCACCTT                                       |
| Rqpcrprm1      | CCGCGATATTCAATGTAGCC                                   | Ccg-4_R     | TCATCGGAGTGAGCAGTGAG                                       |
| NCU09693F1     | GTAACGCCAGGGTTTTCCAGTCACGAC<br>GGTGCCTGGTTTTCTCGACTT   | Mfa-1_F     | CGGTATCTCGCTCTCAACGT                                       |
| NCU09693R1     | ATCCACTTAACGTTACTGAAATCTCCAAC<br>TCTACGGACATAGTCGAGGT  | Mfa-1_R     | GGTGCTCCCATTGTGCAGA                                        |
| NCU09693F2     | CTCCTTCAATATCATCTTCTGTCTCCGACT<br>TGGTCGACCACTATTTCCC  | Pre-1_F     | GAATGCTTCCACGTCCCTA                                        |
| NCU09693R2     | GCGGATAACAATTTACACAGGAAACAG<br>CCGTCATAATGGAAGACGGGA   | Pre-1_R     | AAGGCGGTAGGATTGTTGTG                                       |
| NCU00811F1     | GTAACGCCAGGGTTTTCCAGTCACGAC<br>GCAGTCTACCAAGGAACGACC   | Pre-2_F     | CACCAACTTTTCTCCTCCA                                        |
| NCU00811R1     | ATCCACTTAACGTTACTGAAATCTCCAAC<br>CCAAGGAGTGTGGTGTAGC   | Pre-2_R     | GTCGTCGTCGTGGTGTATG                                        |
| NCU00811F2     | CTCCTTCAATATCATCTTCTGTCTCCGACT<br>ACGGGCTACGTTATCTAGG  | 04732F      | AGATCTAGACATGCCCTTGGTATCAGG<br>A                           |
| NCU00811R2     | GCGGATAACAATTTACACAGGAAACAG<br>CAGTGCTTCTACTACCAGACC   | 04732R      | GGGCCCTCATTCAATTAATTAACACCAA<br>ATCTCCTCTTCACTCC           |
| NCU00995F1     | GTAACGCCAGGGTTTTCCAGTCACGAC<br>GTTGGTCTTAGTACTCTCG     | Fgfp+8xgly  | TTTGGATCCCGCGCGGTTGGTGGCGGC<br>GGTGGTATGGTGGTGGTGGTGGCGGAG |
| NCU00995R1     | ATCCACTTAACGTTACTGAAATCTCCAAC<br>CTAGTCCGTCACATTGAAGC  | Rgfp+8xgly  | AAAGGATCCCAACCGCCACCACCCGC<br>CGCCCTTGACAGCTCGTCCATGC      |
| NCU00995F2     | CTCCTTCAATATCATCTTCTGTCTCCGACG<br>GGATGGGTTTCGTTGAGATA |             |                                                            |
