# Supplementary material
Source: PubMed Central journal article supplement (PMC3813871)
Supplement: a1ef2a7857702b87a3943432bd45e5fb_genetics.113.156984-6.pdf [file a1ef2a7857702b87a3943432bd45e5fb_genetics.113.156984-6.pdf]

**Table S3** (A) functional categories overrepresented ( $P < 0.05$ ) present among the genes identified that are positively regulated by pp-1 (down in  $\Delta pp-1$ ) in at least one time point during the three to eight or the four to six hour time course. (B) functional categories overrepresented ( $P < 0.05$ ) present among the genes identified that are negatively regulated by pp-1 (up in  $\Delta pp-1$ ) in at least one time point during the three to eight or the four to six hour time course.

A.

| Functional category                                       | Abs Set | Rel Set | Genes Set                                                                                                                                                                                                                                                                                                                                                                                                                                                                                                         | Abs Genome | Rel Genome | Rel Set/Rel Genome | P-Value         |
|-----------------------------------------------------------|---------|---------|-------------------------------------------------------------------------------------------------------------------------------------------------------------------------------------------------------------------------------------------------------------------------------------------------------------------------------------------------------------------------------------------------------------------------------------------------------------------------------------------------------------------|------------|------------|--------------------|-----------------|
| 14.13.04 Lysosomal and vacuolar protein degradation       | 2       | 2.85    | NCU01545 NCU04192                                                                                                                                                                                                                                                                                                                                                                                                                                                                                                 | 13         | 0.12       | 23.75              | 0.004           |
| 30.05.02.24 G-protein coupled receptor signalling pathway | 2       | 2.85    | NCU01545 NCU09427                                                                                                                                                                                                                                                                                                                                                                                                                                                                                                 | 17         | 0.16       | 17.812             | 0.006           |
| 30.05.02.24.04 Gamma-aminobutyric acid signalling pathway | 1       | 1.42    | NCU01545                                                                                                                                                                                                                                                                                                                                                                                                                                                                                                          | 1          | 0          | 0                  | 0.007           |
| 30.05 transmembrane signal transduction                   | 3       | 4.28    | NCU01545 NCU09427 NCU04834                                                                                                                                                                                                                                                                                                                                                                                                                                                                                        | 63         | 0.62       | 6.90               | 0.009           |
| 99 Unclassified proteins                                  | 50      | 71.4    | NCU05178 NCU05395 NCU00746<br>NCU05593 NCU01697 NCU06373<br>NCU05856 NCU00354 NCU03708<br>NCU07817 NCU03344 NCU05814<br>NCU02176 NCU05495 NCU00881<br>NCU02298 NCU21668 NCU04122<br>NCU06115 NCU07802 NCU04278<br>NCU07439 NCU21253 NCU01189<br>NCU05408 NCU06919 NCU02465<br>NCU04542 NCU08257 NCU08037<br>NCU00995 NCU01191 NCU08833<br>NCU10052 NCU06514 NCU02488<br>NCU05502 NCU09562 NCU00265<br>NCU03960 NCU05831 NCU04429<br>NCU04732 NCU01380 NCU02432<br>NCU00811 NCU07091 NCU09693<br>NCU21678 NCU09802 | 5853       | 58.1       | 1.23               | 0.015           |
| 30.05.02 Non-enzymatic receptor mediated signalling       | 2       | 2.85    | NCU09427 NCU01545                                                                                                                                                                                                                                                                                                                                                                                                                                                                                                 | 27         | 0.26       | 10.96153846        | 0.01495<br>7492 |
| 14.07.11.01 Autoproteolytic processing                    | 1       | 1.42    | NCU01545                                                                                                                                                                                                                                                                                                                                                                                                                                                                                                          | 7          | 0.06       | 23.66666667        | 0.04768<br>8778 |
| 14.13.04.02 Vacuolar protein degradation                  | 1       | 1.42    | NCU04192                                                                                                                                                                                                                                                                                                                                                                                                                                                                                                          | 7          | 0.06       | 23.66666667        | 0.04768<br>8778 |
| 16.01.01 Receptor binding                                 | 1       | 1.42    | NCU01545                                                                                                                                                                                                                                                                                                                                                                                                                                                                                                          | 7          | 0.06       | 23.66666667        | 0.04768<br>8778 |

B.

| Functional category                                       | Abs Set | Rel Set | Genes Set                                                                        | Abs Genome | Rel Genome | Rel Set/Rel Genome | P-Value |
|-----------------------------------------------------------|---------|---------|----------------------------------------------------------------------------------|------------|------------|--------------------|---------|
| 11 Transcription                                          | 8       | 20.5    | NCU04611 NCU02729<br>NCU03794 NCU05194<br>NCU07528 NCU01772<br>NCU03669 NCU01183 | 725        | 7.2        | 2.85               | 0.006   |
| 11.06 rna modification                                    | 2       | 5.12    | NCU03669 NCU07528                                                                | 42         | 0.41       | 12.49              | 0.011   |
| 01.06.06.13 Tetraterpenes (carotenoids) metabolism        | 1       | 2.56    | NCU07719                                                                         | 3          | 0.02       | 128.00             | 0.012   |
| 11.02 RNA synthesis                                       | 6       | 15.3    | NCU01772 NCU02729<br>NCU04611 NCU01183<br>NCU03669 NCU05194                      | 533        | 5.29       | 2.89               | 0.016   |
| 01.01.09.05.01 Biosynthesis of tyrosine                   | 1       | 2.56    | NCU06360                                                                         | 5          | 0.04       | 64.00              | 0.019   |
| 32.07.07.07 Superoxide metabolism                         | 1       | 2.56    | NCU09560                                                                         | 5          | 0.04       | 64.00              | 0.019   |
| 11.02.03 mRNA Synthesis                                   | 5       | 12.8    | NCU05194 NCU01772<br>NCU04611 NCU02729<br>NCU03669                               | 465        | 4.61       | 2.78               | 0.032   |
| 01.01.09.01.02 Degradation of glycine                     | 1       | 2.56    | NCU02727                                                                         | 10         | 0.09       | 28.44              | 0.038   |
| 01.05.05.07 C-1 compound catabolism                       | 1       | 2.56    | NCU02727                                                                         | 10         | 0.09       | 28.44              | 0.038   |
| 11.06.01 rRNA modification                                | 1       | 2.56    | NCU03669                                                                         | 10         | 0.09       | 28.44              | 0.038   |
| 11.02.03.01 General transcription activities              | 2       | 5.12    | NCU04611 NCU01772                                                                | 84         | 0.83       | 6.17               | 0.042   |
| 11.02.03.04 Transcriptional control                       | 4       | 10.2    | NCU02729 NCU05194<br>NCU04611 NCU03669                                           | 350        | 3.47       | 2.94               | 0.045   |
| 01.05.05 C-1 compound metabolism                          | 1       | 2.56    | NCU02727                                                                         | 12         | 0.11       | 23.27              | 0.046   |
| 34.11.11 Rhythm (e.g. circadian, ultradian)               | 1       | 2.56    | NCU02500                                                                         | 12         | 0.11       | 23.27              | 0.046   |
| 01.01.09.01.01 Biosynthesis of glycine                    | 1       | 2.56    | NCU02727                                                                         | 13         | 0.12       | 21.33              | 0.049   |
| 10.01.03.03 ORI recognition and priming complex formation | 1       | 2.56    | NCU05194                                                                         | 13         | 0.12       | 21.33              | 0.049   |
| 40.01.05 Growth regulators / regulation of cell size      | 1       | 2.56    | NCU02729                                                                         | 13         | 0.12       | 21.33              | 0.049   |
