# Supplementary material
Source: PubMed Central journal article supplement (PMC3813871)
Supplement: c96a16bdd1b0670ec5b2de84b423d803_genetics.113.156984-1.pdf [file c96a16bdd1b0670ec5b2de84b423d803_genetics.113.156984-1.pdf]

## Files S1-S2

Available for download at <http://www.genetics.org/lookup/suppl/doi:10.1534/genetics.113.156984/-/DC1>

### File S1

#### Supplemental Dataset 1

**Sheet 1:** Genes identified that are regulated by PP-1 either positively (at least 1.5-fold down in  $\Delta pp-1$ ) or negatively (at least 1.5-fold up in  $\Delta pp-1$ ) using RNAseq analysis of cells grown for five hours

**Sheet 2:** Functional categories present among the genes that are positively or negatively regulated by PP-1 as given in Sheet 1 (categories overrepresented,  $p < 0.05$ , are given in bold)

### File S2

#### Supplemental Dataset 2

**Sheet 1:** Genes identified that are regulated by MAK-2 either positively (down in  $\Delta mak-2q100G$ ) or negatively (up in  $\Delta mak-2q100G$ ) after addition of 1NM-PP1 compared to treatment with DMSO alone

**Sheet 2:** Functional categories present among the genes that are positively or negatively regulated by MAK-2 as given in sheet 1 (categories overrepresented,  $p < 0.05$ , are given in bold)

**Table S1 Primers Used In This Study**

| Primer Name    | Sequence                                               | Primer Name | Sequence                                                  |
|----------------|--------------------------------------------------------|-------------|-----------------------------------------------------------|
| Pp-1-Paci-R06  | CTTTAATTAATACTAGCTCGTTTCGC<br>A                        | NCU00995R2  | GCGGATAACAATTTACACAGGAAACAG<br>CACGACCATCGAATTCCTACC      |
| Pp-1-Spei-F06  | CGACTAAGTATGTATTCTTCGCAGCATGC                          | NCU01121F1  | GTAACGCCAGGGTTTTCCAGTCACGAC<br>GGAAAGACTCTCCAGATCAGC      |
| Pp-1p-Noti-F06 | GCGGCCGCGACCATAGTGGTGTAGACTA<br>CT                     | NCU01121R1  | ATCCACTTAACGTTACTGAAATCTCCAAC<br>GGTATTGTTGGGAGTACTGG     |
| Pp-1p-Spei-R06 | CGACTAGTTCCAAGCTTAAAAACCTCCTT<br>GATA                  | NCU01121F2  | CTCCTTCAATATCATCTTCTGTCTCCGACC<br>TAGGAAATACGAAGGACGG     |
| Pp-1 Sgra1-F06 | TCTACCCACCGCGAGTATG                                    | NCU01121R2  | GCGGATAACAATTTACACAGGAAACAG<br>CAGTTACGACGAAACACCCAC      |
| Pp-1-Sfii-R06  | AAAGAGGACGAGTTGGCCTGCTGGTGG<br>GCCTTG                  | NCU01380F1  | GTAACGCCAGGGTTTTCCAGTCACGAC<br>GATATGCGGAGGCACTTCAAG      |
| Pp1-Smtrpr06   | CGCTGTAACAGAAGAACACCTT                                 | NCU01380R1  | ATCCACTTAACGTTACTGAAATCTCCAAC<br>TTGTGCTGAGGCTATCCGTT     |
| Pp1-Smtrp-F06  | AAGGTGTTCTTCTGTTACAGCG                                 | NCU01380F2  | CTCCTTCAATATCATCTTCTGTCTCCGACA<br>CCCTGAGCTTTATGTGACC     |
| Pp-1-Smc-F06   | TACGTCACTCATAACAGCCAGAAG                               | NCU01380R2  | GCGGATAACAATTTACACAGGAAACAG<br>CAAGCTCTATTGGCATGGAGG      |
| Pp-1-Smc-R06   | CTTCTGGCTGTATGAGCTGACGTA                               | F00811      | GCGCGCTTACTATTGAAG                                        |
| Pp-1-Afiii-F06 | CGTTTGGAGCACCTTAAGAG                                   | R00811      | GATAGATGGCGCAAAGGATG                                      |
| Pp-1-Nsii-R06  | GTAGATTGGAAGGGTGAATG                                   | F00995      | GAGGCAAGACGGTAAGTTGG                                      |
| Fqpcr00881     | TGCTCACATCAACTCC                                       | R00995      | TCCGGTTGGTATGTTGGTTT                                      |
| Rqpcr00881     | CCGAGGTTGACGTAGATA                                     | F01121      | CAGGGGAAAGCAATCAAGAG                                      |
| Fqpcr04732     | CAAGTATAACTCGGCTG                                      | R01121      | TCGTCAATCTCCTCCTCGTT                                      |
| Rqpcr04732     | TAGCACCTCGTGACAATG                                     | F01380      | CCATCGTCCAACCTTCTCCTC                                     |
| Fqpcr02613     | GCTGGTTTGATTGGGGTAGA                                   | R01380      | TTCATGAGCATGTGTGCTTG                                      |
| Rqpcr02613     | AAGTAGGGGCGGAGTTTGAT                                   | F09693      | GCAGTCCAGTGGTGAAGGAT                                      |
| Fqpcr02246     | GCTTGCCTCTCACGACTACC                                   | R09693      | CCGTTGACCCAGTAGGTTTG                                      |
| Rqpcr02246     | CGGAGCTAAAGCTCAAGGTG                                   | Hygrupflk   | GAATAGAGTAGATGCCGACC                                      |
| Fqpcrprm1      | TCTGCTCCAACAACCTCTTC                                   | Ccg-4_F     | CTTCTCCGTGACACCACCTT                                      |
| Rqpcrprm1      | CCGCGATATTCAATGTAGCC                                   | Ccg-4_R     | TCATCGGAGTGAGCAGTGAG                                      |
| NCU09693F1     | GTAACGCCAGGGTTTTCCAGTCACGAC<br>GGTGCCTGGTTTTCTCGACTT   | Mfa-1_F     | CGGTATCTCGCCTCTCAACGT                                     |
| NCU09693R1     | ATCCACTTAACGTTACTGAAATCTCCAAC<br>TCTACGGACATAGTCGAGGT  | Mfa-1_R     | GGTGCTCCCATTGTGCAGA                                       |
| NCU09693F2     | CTCCTTCAATATCATCTTCTGTCTCCGACT<br>TGGTCGACCACTATTTCCC  | Pre-1_F     | GAATGCTTCCACGTCCCTA                                       |
| NCU09693R2     | GCGGATAACAATTTACACAGGAAACAG<br>CCGTCATAATGGAAGACGGGA   | Pre-1_R     | AAGGCGGTAGGATTGTTGTG                                      |
| NCU00811F1     | GTAACGCCAGGGTTTTCCAGTCACGAC<br>GCAGTCTACCAAGGAACGACC   | Pre-2_F     | CACCAACTTTTCTCCTCCA                                       |
| NCU00811R1     | ATCCACTTAACGTTACTGAAATCTCCAAC<br>CCAAGGAGTGTGGTGTAGC   | Pre-2_R     | GTCGTCGTCGTGGTGTATG                                       |
| NCU00811F2     | CTCCTTCAATATCATCTTCTGTCTCCGACT<br>ACGGGCTACGTTATCTAGG  | 04732F      | AGATCTAGACATGCCCTTGGTATCAGG<br>A                          |
| NCU00811R2     | GCGGATAACAATTTACACAGGAAACAG<br>CAGTGCTTTCCTACTACCAGACC | 04732R      | GGGCCCTCATTCAATTAATTAACACCAA<br>ATCTCCTTCTCACTCC          |
| NCU00995F1     | GTAACGCCAGGGTTTTCCAGTCACGAC<br>GTTGGTTCCTAGTACTCCTCG   | Fgfp+8xgly  | TTTGGATCCCGCGCGGTTGGTGGCGGC<br>GGTGGTATGGTGTGAGCAAGGGCGAG |
| NCU00995R1     | ATCCACTTAACGTTACTGAAATCTCCAAC<br>CTAGTCCGTCACATTGAAGC  | Rgfp+8xgly  | AAAGGATCCCAACCGCCACCACCCGC<br>CGCCCTTGACAGCTCGTCCATGC     |
| NCU00995F2     | CTCCTTCAATATCATCTTCTGTCTCCGACG<br>GGATGGGTTTCGTTGAGATA |             |                                                           |

**Table S2 Clusters Of Genes Showing Temporal Expression During 3-8 Hr Time Germination Time Course and Genes Found Uniquely Higher Or Lower Expressed In The 4-6 Hr Loop. Genes ID Numbers In Bold Are Genes Up Regulated In The  $\Delta Pp-1$  Mutant Compared To Wild Type.**

| Gene ID         | Annotation                                      | Cluster | Gene ID         | Annotation                             | Cluster |
|-----------------|-------------------------------------------------|---------|-----------------|----------------------------------------|---------|
| <b>NCU00566</b> | Synaptobrevin                                   | 1       | NCU00601        | Nf                                     | 2       |
| NCU00881        | <i>Ham-7</i>                                    | 1       | NCU00746        | <i>Crp-68</i>                          | 2       |
| <b>NCU00906</b> | Hypothetical                                    | 1       | NCU01380        | Hypothetical                           | 2       |
| <b>NCU01183</b> | <i>Gtp-1</i>                                    | 1       | NCU01697        | Hypothetical                           | 2       |
| <b>NCU01772</b> | DNA-Directed RNA Polymerase III                 | 1       | NCU02176        | Hypothetical                           | 2       |
| <b>NCU02500</b> | <i>Ccg-4</i>                                    | 1       | NCU02458        | Hypothetical                           | 2       |
| <b>NCU02635</b> | Mannan Polymerase Complexes MNN9 Subunit        | 1       | NCU03196        | Cyclin Pch1                            | 2       |
| <b>NCU02644</b> | Hypothetical                                    | 1       | NCU03868        | Hypothetical                           | 2       |
| NCU03276        | <i>Bem46</i>                                    | 1       | NCU04429        | Mitochondrial Import Protein Mmp37     | 2       |
| <b>NCU03669</b> | Adomet-Dependent Rrna Methyltransferase Spb1    | 1       | NCU04729        | Hypothetical                           | 2       |
| NCU03708        | Hypothetical                                    | 1       | NCU05178        | Hypothetical                           | 2       |
| <b>NCU03794</b> | Periodic Tryptophan Protein 2                   | 1       | NCU05357        | Predicted                              | 2       |
| <b>NCU03830</b> | Hypothetical                                    | 1       | NCU06373        | Hypothetical                           | 2       |
| <b>NCU03837</b> | Snf1 Kinase Complex Beta-Subunit Gal83          | 1       | <b>NCU08457</b> | Eas                                    | 2       |
| NCU03960        | Hypothetical                                    | 1       | NCU08833        | Hypothetical                           | 2       |
| NCU04122        | Malate Dehydrogenase                            | 1       | NCU10052        | Hypothetical                           | 2       |
| <b>NCU04344</b> | Eif2b-Alpha                                     | 1       | <b>NCU00209</b> | Hypothetical                           | 3       |
| <b>NCU04611</b> | Transcription Elongation Factor Spt-6           | 1       | NCU00265        | Hypothetical                           | 3       |
| NCU04732        | <i>Ham-11</i>                                   | 1       | <b>NCU00309</b> | WSC Domain-Containing Protein          | 3       |
| NCU04834        | <i>Phy-1</i>                                    | 1       | <b>NCU01121</b> | Hypothetical                           | 3       |
| <b>NCU05194</b> | DNA Replication Licensing Factor Mcm6           | 1       | NCU01618        | Predicted                              | 3       |
| NCU05337        | Predicted                                       | 1       | <b>NCU04047</b> | Hypothetical                           | 3       |
| NCU05400        | Hypothetical                                    | 1       | NCU04349        | <i>Stk-58 (CHECK)</i>                  | 3       |
| NCU05814        | Hypothetical                                    | 1       | <b>NCU04452</b> | <i>Mig-3</i>                           | 3       |
| NCU06115        | Hypothetical                                    | 1       | NCU05127        | D-Alanyl-Alanine Synthetase A          | 3       |
| NCU06919        | Hypothetical                                    | 1       | NCU05495        | <i>Ccg-16</i>                          | 3       |
| NCU07029        | Hypothetical                                    | 1       | NCU05502        | Hypothetical                           | 3       |
| <b>NCU07313</b> | Chromosome Transmission Fidelity Protein 18     | 1       | NCU05831        | Hypothetical                           | 3       |
| <b>NCU07503</b> | Hypothetical                                    | 1       | NCU06514        | Hypothetical                           | 3       |
| <b>NCU07528</b> | Trna Pseudouridine Synthase                     | 1       | NCU07439        | Hypothetical                           | 3       |
| NCU07609        | MFS Transporter                                 | 1       | NCU07802        | Hypothetical                           | 3       |
| NCU07610        | Taurine Dioxygenase                             | 1       | NCU09562        | Hypothetical                           | 3       |
| <b>NCU07719</b> | Isopentenyl-Diphosphate Delta-Isomerase         | 1       | NCU09693        | Hypothetical                           | 3       |
| NCU08332        | <i>Hex-1</i>                                    | 1       | NCU09802        | Hypothetical                           | 3       |
| NCU08656        | Hypothetical                                    | 1       | <b>NCU09894</b> | CCAAT-Box-Binding Transcription Factor | 3       |
| <b>NCU08824</b> | Molybdopterin Binding Domain-Containing Protein | 1       | NCU00811        | Hypothetical                           | 4       |

|                 |                           |   |                 |                                       |   |
|-----------------|---------------------------|---|-----------------|---------------------------------------|---|
| NCU09427        | <i>Gpr-3</i>              | 1 | NCU00995        | Hypothetical                          | 4 |
| <b>NCU09498</b> | Hypothetical              | 1 | <b>NCU02361</b> | Formamidase                           | 4 |
| <b>NCU09560</b> | Superoxide Dismutase      | 1 | <b>NCU02727</b> | Glycine Cleavage System T Protein     | 4 |
| <b>NCU10292</b> | Porphobilinogen Deaminase | 1 | <b>NCU06360</b> | Histidinol-Phosphate Aminotransferase | 4 |

Genes Uniquely Down Regulated In The 4-6 Hour Loop

Genes Uniquely Up Regulated In The 4-6 Hour Loop

| Gene ID    | Annotation                                                                         | Gene ID         | Annotation                             |
|------------|------------------------------------------------------------------------------------|-----------------|----------------------------------------|
| 1nc380_040 | Hypothetical                                                                       | <b>NCU00973</b> | Hypothetical                           |
| NCU00354   | Hypothetical                                                                       | <b>NCU01124</b> | Hypothetical                           |
| NCU00556   | RNA Binding Protein                                                                | <b>NCU02729</b> | Transducin Family Protein              |
| NCU01189   | Hypothetical                                                                       | <b>NCU03153</b> | Hypothetical                           |
| NCU01191   | Hypothetical                                                                       | <b>NCU03192</b> | Hypothetical                           |
| NCU01459   | Tan Spore <i>Asl-2</i>                                                             | <b>NCU04966</b> | Predicted Protein                      |
| NCU01545   | <i>Atg-8</i>                                                                       | <b>NCU09300</b> | RNA Polymerase II CTD Phosphatase Fcp1 |
| NCU02298   | Hypothetical                                                                       | <b>NCU09992</b> | Serine Peptidase                       |
| NCU02465   | Hypothetical                                                                       |                 |                                        |
| NCU02488   | Hypothetical                                                                       |                 |                                        |
| NCU03013   | Anchored Cell Wall Protein-10, <i>Acw-10</i>                                       |                 |                                        |
| NCU03344   | Hypothetical                                                                       |                 |                                        |
| NCU04192   | Vacuolar Aspartyl Aminopeptidase <i>Lap4</i>                                       |                 |                                        |
| NCU04278   | Hypothetical                                                                       |                 |                                        |
| NCU04542   | Hypothetical                                                                       |                 |                                        |
| NCU05233   | P60 Domain-Containing Protein                                                      |                 |                                        |
| NCU05395   | Hypothetical                                                                       |                 |                                        |
| NCU05408   | Predicted Protein                                                                  |                 |                                        |
| NCU05593   | Topogenesis Of Mitochondrial Outer Membrane Beta Barrel Proteins 55, <i>Tob-55</i> |                 |                                        |
| NCU05856   | Hypothetical                                                                       |                 |                                        |
| NCU05959   | Vesicle Transport V-SNARE Protein VTI1                                             |                 |                                        |
| NCU06698   | Glycogenin <i>Gnn</i>                                                              |                 |                                        |
| NCU07091   | Hypothetical                                                                       |                 |                                        |
| NCU07817   | Non-Anchored Cell Wall Protein-3, <i>Ncw-3</i>                                     |                 |                                        |
| NCU08037   | Hypothetical                                                                       |                 |                                        |
| NCU08257   | Hypothetical                                                                       |                 |                                        |

**Table S3** (A) functional categories overrepresented ( $P < 0.05$ ) present among the genes identified that are positively regulated by pp-1 (down in  $\Delta pp-1$ ) in at least one time point during the three to eight or the four to six hour time course. (B) functional categories overrepresented ( $P < 0.05$ ) present among the genes identified that are negatively regulated by pp-1 (up in  $\Delta pp-1$ ) in at least one time point during the three to eight or the four to six hour time course.

A.

| Functional category                                       | Abs Set | Rel Set | Genes Set                                                                                                                                                                                                                                                                                                                                                                                                                                                                                                         | Abs Genome | Rel Genome | Rel Set/Rel Genome | P-Value         |
|-----------------------------------------------------------|---------|---------|-------------------------------------------------------------------------------------------------------------------------------------------------------------------------------------------------------------------------------------------------------------------------------------------------------------------------------------------------------------------------------------------------------------------------------------------------------------------------------------------------------------------|------------|------------|--------------------|-----------------|
| 14.13.04 Lysosomal and vacuolar protein degradation       | 2       | 2.85    | NCU01545 NCU04192                                                                                                                                                                                                                                                                                                                                                                                                                                                                                                 | 13         | 0.12       | 23.75              | 0.004           |
| 30.05.02.24 G-protein coupled receptor signalling pathway | 2       | 2.85    | NCU01545 NCU09427                                                                                                                                                                                                                                                                                                                                                                                                                                                                                                 | 17         | 0.16       | 17.812             | 0.006           |
| 30.05.02.24.04 Gamma-aminobutyric acid signalling pathway | 1       | 1.42    | NCU01545                                                                                                                                                                                                                                                                                                                                                                                                                                                                                                          | 1          | 0          | 0                  | 0.007           |
| 30.05 transmembrane signal transduction                   | 3       | 4.28    | NCU01545 NCU09427 NCU04834                                                                                                                                                                                                                                                                                                                                                                                                                                                                                        | 63         | 0.62       | 6.90               | 0.009           |
| 99 Unclassified proteins                                  | 50      | 71.4    | NCU05178 NCU05395 NCU00746<br>NCU05593 NCU01697 NCU06373<br>NCU05856 NCU00354 NCU03708<br>NCU07817 NCU03344 NCU05814<br>NCU02176 NCU05495 NCU00881<br>NCU02298 NCU21668 NCU04122<br>NCU06115 NCU07802 NCU04278<br>NCU07439 NCU21253 NCU01189<br>NCU05408 NCU06919 NCU02465<br>NCU04542 NCU08257 NCU08037<br>NCU00995 NCU01191 NCU08833<br>NCU10052 NCU06514 NCU02488<br>NCU05502 NCU09562 NCU00265<br>NCU03960 NCU05831 NCU04429<br>NCU04732 NCU01380 NCU02432<br>NCU00811 NCU07091 NCU09693<br>NCU21678 NCU09802 | 5853       | 58.1       | 1.23               | 0.015           |
| 30.05.02 Non-enzymatic receptor mediated signalling       | 2       | 2.85    | NCU09427 NCU01545                                                                                                                                                                                                                                                                                                                                                                                                                                                                                                 | 27         | 0.26       | 10.96153846        | 0.01495<br>7492 |
| 14.07.11.01 Autoproteolytic processing                    | 1       | 1.42    | NCU01545                                                                                                                                                                                                                                                                                                                                                                                                                                                                                                          | 7          | 0.06       | 23.66666667        | 0.04768<br>8778 |
| 14.13.04.02 Vacuolar protein degradation                  | 1       | 1.42    | NCU04192                                                                                                                                                                                                                                                                                                                                                                                                                                                                                                          | 7          | 0.06       | 23.66666667        | 0.04768<br>8778 |
| 16.01.01 Receptor binding                                 | 1       | 1.42    | NCU01545                                                                                                                                                                                                                                                                                                                                                                                                                                                                                                          | 7          | 0.06       | 23.66666667        | 0.04768<br>8778 |

B.

| Functional category                                       | Abs Set | Rel Set | Genes Set                                                                        | Abs Genome | Rel Genome | Rel Set/Rel Genome | P-Value |
|-----------------------------------------------------------|---------|---------|----------------------------------------------------------------------------------|------------|------------|--------------------|---------|
| 11 Transcription                                          | 8       | 20.5    | NCU04611 NCU02729<br>NCU03794 NCU05194<br>NCU07528 NCU01772<br>NCU03669 NCU01183 | 725        | 7.2        | 2.85               | 0.006   |
| 11.06 rna modification                                    | 2       | 5.12    | NCU03669 NCU07528                                                                | 42         | 0.41       | 12.49              | 0.011   |
| 01.06.06.13 Tetraterpenes (carotenoids) metabolism        | 1       | 2.56    | NCU07719                                                                         | 3          | 0.02       | 128.00             | 0.012   |
| 11.02 RNA synthesis                                       | 6       | 15.3    | NCU01772 NCU02729<br>NCU04611 NCU01183<br>NCU03669 NCU05194                      | 533        | 5.29       | 2.89               | 0.016   |
| 01.01.09.05.01 Biosynthesis of tyrosine                   | 1       | 2.56    | NCU06360                                                                         | 5          | 0.04       | 64.00              | 0.019   |
| 32.07.07.07 Superoxide metabolism                         | 1       | 2.56    | NCU09560                                                                         | 5          | 0.04       | 64.00              | 0.019   |
| 11.02.03 mRNA Synthesis                                   | 5       | 12.8    | NCU05194 NCU01772<br>NCU04611 NCU02729<br>NCU03669                               | 465        | 4.61       | 2.78               | 0.032   |
| 01.01.09.01.02 Degradation of glycine                     | 1       | 2.56    | NCU02727                                                                         | 10         | 0.09       | 28.44              | 0.038   |
| 01.05.05.07 C-1 compound catabolism                       | 1       | 2.56    | NCU02727                                                                         | 10         | 0.09       | 28.44              | 0.038   |
| 11.06.01 rRNA modification                                | 1       | 2.56    | NCU03669                                                                         | 10         | 0.09       | 28.44              | 0.038   |
| 11.02.03.01 General transcription activities              | 2       | 5.12    | NCU04611 NCU01772                                                                | 84         | 0.83       | 6.17               | 0.042   |
| 11.02.03.04 Transcriptional control                       | 4       | 10.2    | NCU02729 NCU05194<br>NCU04611 NCU03669                                           | 350        | 3.47       | 2.94               | 0.045   |
| 01.05.05 C-1 compound metabolism                          | 1       | 2.56    | NCU02727                                                                         | 12         | 0.11       | 23.27              | 0.046   |
| 34.11.11 Rhythm (e.g. circadian, ultradian)               | 1       | 2.56    | NCU02500                                                                         | 12         | 0.11       | 23.27              | 0.046   |
| 01.01.09.01.01 Biosynthesis of glycine                    | 1       | 2.56    | NCU02727                                                                         | 13         | 0.12       | 21.33              | 0.049   |
| 10.01.03.03 ORI recognition and priming complex formation | 1       | 2.56    | NCU05194                                                                         | 13         | 0.12       | 21.33              | 0.049   |
| 40.01.05 Growth regulators / regulation of cell size      | 1       | 2.56    | NCU02729                                                                         | 13         | 0.12       | 21.33              | 0.049   |

**Table S4 Overlapping Gene Sets That Showed Decreased (Dn) Or Increased (Up) Expression Levels In  $\Delta Pp-1$  And  $Mak-2^{Q100G}$  Datasets**

| Dn $\Delta Pp-1$<br>Microarray And<br>Rnaseq | Annotation                          | Dn $\Delta Pp-1$<br>Rnaseq And<br>$Mak-2^{Q100G}$<br>Microarray | Annotation               | Dn $\Delta Pp-1$<br>Microarray And<br>$Mak-2^{Q100G}$<br>Microarray | Annotation              |
|----------------------------------------------|-------------------------------------|-----------------------------------------------------------------|--------------------------|---------------------------------------------------------------------|-------------------------|
| NCU00811                                     | Hypothetical                        | <b>NCU00881</b>                                                 | <i>Ham-7</i>             | <b>NCU00881</b>                                                     | <i>Ham-7</i>            |
| <b>NCU00881</b>                              | <i>Ham-7</i>                        | <b>NCU00995</b>                                                 | Hypothetical             | <b>NCU00995</b>                                                     | Hypothetical            |
| <b>NCU00995</b>                              | Hypothetical                        | NCU01328                                                        | Transketolase            | <b>NCU01697</b>                                                     | Hypothetical            |
| NCU01380                                     | Hypothetical                        | NCU01509                                                        | Hypothetical             | <b>NCU03960</b>                                                     | <i>Ham-12</i>           |
| <b>NCU01697</b>                              | Hypothetical                        | <b>NCU01697</b>                                                 | Hypothetical             | <b>NCU04122</b>                                                     | Malate<br>Dehydrogenase |
| NCU03013                                     | <i>Acw-10</i>                       | NCU02110                                                        | <i>Nox-1</i>             | <b>NCU04732</b>                                                     | <i>Ham-11</i>           |
| <b>NCU03960</b>                              | <i>Ham-12</i>                       | NCU02209                                                        | Fatty Acid<br>Desaturase | NCU07439                                                            | Hypothetical            |
| <b>NCU04122</b>                              | Malate<br>Dehydrogenase             | NCU02767                                                        | <i>Ham-6</i>             | <b>NCU09693</b>                                                     | Hypothetical            |
| NCU04192                                     | Vacuolar Aspartyl<br>Aminopeptidase | NCU03132                                                        | Hypothetical             |                                                                     |                         |
| <b>NCU04732</b>                              | <i>Ham-11</i>                       | NCU03192                                                        | Hypothetical             |                                                                     |                         |
| NCU05814                                     | Hypothetical                        | NCU03396                                                        | <i>Nop-58</i>            |                                                                     |                         |
| NCU06698                                     | Glycogenin                          | <b>NCU03960</b>                                                 | <i>Ham-12</i>            |                                                                     |                         |
| NCU07802                                     | Hypothetical                        | <b>NCU04122</b>                                                 | Malate<br>Dehydrogenase  |                                                                     |                         |
| NCU08332                                     | <i>Hex-1</i>                        | NCU04527                                                        | Hypothetical             |                                                                     |                         |
| NCU09562                                     | Hypothetical                        | NCU04647                                                        | Actin-Binding<br>Protein |                                                                     |                         |
| <b>NCU09693</b>                              | Hypothetical                        | <b>NCU04732</b>                                                 | <i>Ham-11</i>            |                                                                     |                         |
|                                              |                                     | NCU05789                                                        | Secreted<br>Glucosidase  |                                                                     |                         |
|                                              |                                     | NCU05835                                                        | Hypothetical             |                                                                     |                         |
|                                              |                                     | NCU06034                                                        | Hypothetical             |                                                                     |                         |
|                                              |                                     | NCU06117                                                        | Hypothetical             |                                                                     |                         |
|                                              |                                     | NCU06989                                                        | Hypothetical             |                                                                     |                         |
|                                              |                                     | NCU07192                                                        | Hypothetical             |                                                                     |                         |
|                                              |                                     | NCU07392                                                        | <i>Adv-1</i>             |                                                                     |                         |
|                                              |                                     | NCU07850                                                        | <i>Nor-1</i>             |                                                                     |                         |
|                                              |                                     | NCU09108                                                        | Hypothetical             |                                                                     |                         |
|                                              |                                     | NCU09307                                                        | <i>Lfd-1</i>             |                                                                     |                         |
|                                              |                                     | NCU09337                                                        | <i>Prm-1</i>             |                                                                     |                         |
|                                              |                                     | <b>NCU09693</b>                                                 | Hypothetical             |                                                                     |                         |

| Up $\Delta Pp-1$<br>Microarray And<br>Rnaseq | Annotation                        | Up $\Delta Pp-1$<br>Rnaseq And<br>$Mak-2^{Q100G}$<br>Microarray |                                             | Up $\Delta Pp-1$<br>Microarray And<br>$Mak-2^{Q100G}$<br>Microarray |                                          |
|----------------------------------------------|-----------------------------------|-----------------------------------------------------------------|---------------------------------------------|---------------------------------------------------------------------|------------------------------------------|
| NCU00309                                     | WSC Domain-<br>Containing Protein | NCU03152                                                        | DUF1348<br>Domain-<br>Containing<br>Protein | NCU02727                                                            | Glycine Cleavage<br>System T Protein     |
| NCU02361                                     | Formamidase                       | NCU03222                                                        | Hypothetical                                | NCU06360                                                            | Histidinol-Phosphate<br>Aminotransferase |
| NCU02500                                     | <i>Ccg-4</i>                      | NCU04479                                                        | Lap2                                        |                                                                     |                                          |
| NCU07503                                     | Hypothetical                      | NCU05686                                                        | Cell Wall<br>Glucanase                      |                                                                     |                                          |
| NCU08824                                     | Molybdopterin                     | NCU07953                                                        | <i>Aod-1</i>                                |                                                                     |                                          |

|          |                                                                  |          |                                       |
|----------|------------------------------------------------------------------|----------|---------------------------------------|
| NCU09560 | Binding Domain-<br>Containing Protein<br>Superoxide<br>Dismutase | NCU09116 | Aromatic<br>Aminotransferas<br>e Aro8 |
|          |                                                                  | NCU09141 | <i>Mig-9</i>                          |

---
