# Supplementary material
Source: PubMed Central journal article supplement (PMC3813871)
Supplement: dce7bf5feaeb04a54d53d792adbc9b66_genetics.113.156984-5.pdf [file dce7bf5feaeb04a54d53d792adbc9b66_genetics.113.156984-5.pdf]

**Table S4 Overlapping Gene Sets That Showed Decreased (Dn) Or Increased (Up) Expression Levels In  $\Delta Pp-1$  And  $Mak-2^{Q100G}$  Datasets**

| Dn $\Delta Pp-1$<br>Microarray And<br>Rnaseq | Annotation                          | Dn $\Delta Pp-1$<br>Rnaseq And<br>$Mak-2^{Q100G}$<br>Microarray | Annotation               | Dn $\Delta Pp-1$<br>Microarray And<br>$Mak-2^{Q100G}$<br>Microarray | Annotation              |
|----------------------------------------------|-------------------------------------|-----------------------------------------------------------------|--------------------------|---------------------------------------------------------------------|-------------------------|
| NCU00811                                     | Hypothetical                        | <b>NCU00881</b>                                                 | <i>Ham-7</i>             | <b>NCU00881</b>                                                     | <i>Ham-7</i>            |
| <b>NCU00881</b>                              | <i>Ham-7</i>                        | <b>NCU00995</b>                                                 | Hypothetical             | <b>NCU00995</b>                                                     | Hypothetical            |
| <b>NCU00995</b>                              | Hypothetical                        | NCU01328                                                        | Transketolase            | <b>NCU01697</b>                                                     | Hypothetical            |
| NCU01380                                     | Hypothetical                        | NCU01509                                                        | Hypothetical             | <b>NCU03960</b>                                                     | <i>Ham-12</i>           |
| <b>NCU01697</b>                              | Hypothetical                        | <b>NCU01697</b>                                                 | Hypothetical             | <b>NCU04122</b>                                                     | Malate<br>Dehydrogenase |
| NCU03013                                     | <i>Acw-10</i>                       | NCU02110                                                        | <i>Nox-1</i>             | <b>NCU04732</b>                                                     | <i>Ham-11</i>           |
| <b>NCU03960</b>                              | <i>Ham-12</i>                       | NCU02209                                                        | Fatty Acid<br>Desaturase | NCU07439                                                            | Hypothetical            |
| <b>NCU04122</b>                              | Malate<br>Dehydrogenase             | NCU02767                                                        | <i>Ham-6</i>             | <b>NCU09693</b>                                                     | Hypothetical            |
| NCU04192                                     | Vacuolar Aspartyl<br>Aminopeptidase | NCU03132                                                        | Hypothetical             |                                                                     |                         |
| <b>NCU04732</b>                              | <i>Ham-11</i>                       | NCU03192                                                        | Hypothetical             |                                                                     |                         |
| NCU05814                                     | Hypothetical                        | NCU03396                                                        | <i>Nop-58</i>            |                                                                     |                         |
| NCU06698                                     | Glycogenin                          | <b>NCU03960</b>                                                 | <i>Ham-12</i>            |                                                                     |                         |
| NCU07802                                     | Hypothetical                        | <b>NCU04122</b>                                                 | Malate<br>Dehydrogenase  |                                                                     |                         |
| NCU08332                                     | <i>Hex-1</i>                        | NCU04527                                                        | Hypothetical             |                                                                     |                         |
| NCU09562                                     | Hypothetical                        | NCU04647                                                        | Actin-Binding<br>Protein |                                                                     |                         |
| <b>NCU09693</b>                              | Hypothetical                        | <b>NCU04732</b>                                                 | <i>Ham-11</i>            |                                                                     |                         |
|                                              |                                     | NCU05789                                                        | Secreted<br>Glucosidase  |                                                                     |                         |
|                                              |                                     | NCU05835                                                        | Hypothetical             |                                                                     |                         |
|                                              |                                     | NCU06034                                                        | Hypothetical             |                                                                     |                         |
|                                              |                                     | NCU06117                                                        | Hypothetical             |                                                                     |                         |
|                                              |                                     | NCU06989                                                        | Hypothetical             |                                                                     |                         |
|                                              |                                     | NCU07192                                                        | Hypothetical             |                                                                     |                         |
|                                              |                                     | NCU07392                                                        | <i>Adv-1</i>             |                                                                     |                         |
|                                              |                                     | NCU07850                                                        | <i>Nor-1</i>             |                                                                     |                         |
|                                              |                                     | NCU09108                                                        | Hypothetical             |                                                                     |                         |
|                                              |                                     | NCU09307                                                        | <i>Lfd-1</i>             |                                                                     |                         |
|                                              |                                     | NCU09337                                                        | <i>Prm-1</i>             |                                                                     |                         |
|                                              |                                     | <b>NCU09693</b>                                                 | Hypothetical             |                                                                     |                         |

| Up $\Delta Pp-1$<br>Microarray And<br>Rnaseq | Annotation                        | Up $\Delta Pp-1$<br>Rnaseq And<br>$Mak-2^{Q100G}$<br>Microarray | Annotation                                  | Up $\Delta Pp-1$<br>Microarray And<br>$Mak-2^{Q100G}$<br>Microarray | Annotation                               |
|----------------------------------------------|-----------------------------------|-----------------------------------------------------------------|---------------------------------------------|---------------------------------------------------------------------|------------------------------------------|
| NCU00309                                     | WSC Domain-<br>Containing Protein | NCU03152                                                        | DUF1348<br>Domain-<br>Containing<br>Protein | NCU02727                                                            | Glycine Cleavage<br>System T Protein     |
| NCU02361                                     | Formamidase                       | NCU03222                                                        | Hypothetical                                | NCU06360                                                            | Histidinol-Phosphate<br>Aminotransferase |
| NCU02500                                     | <i>Ccg-4</i>                      | NCU04479                                                        | Lap2                                        |                                                                     |                                          |
| NCU07503                                     | Hypothetical                      | NCU05686                                                        | Cell Wall<br>Glucanase                      |                                                                     |                                          |
| NCU08824                                     | Molybdopterin                     | NCU07953                                                        | <i>Aod-1</i>                                |                                                                     |                                          |

|          |                                                                  |          |                                       |
|----------|------------------------------------------------------------------|----------|---------------------------------------|
| NCU09560 | Binding Domain-<br>Containing Protein<br>Superoxide<br>Dismutase | NCU09116 | Aromatic<br>Aminotransferas<br>e Aro8 |
|          |                                                                  | NCU09141 | <i>Mig-9</i>                          |

---
